# Supplementary material
Source: publisher site journal article supplement (https://www.dovepress.com/article/327341)
Supplement: Supplementary file 1 [file get_supplementary_file.php]

| **Table S1: VAT Inter-reader and Intra-reader Reliability for Image Analysis** | | | | |
| --- | --- | --- | --- | --- |
| **Outcomes** | **Inter-reader Correlation** (n=6) | | **Intra-reader Correlation** (n=6) | |
|  | **ICC** | **Confidence Intervals** | **ICC** | **Confidence Intervals** |
| **VAT SUVmean** | 0.99 | 0.990-0.998 | 0.99 | 0.997-0.999 |
| **VAT Volume** | 0.99 | 0.979-0.997 | 0.99 | 0.993-0.999 |
| **SAT SUVmean** | 0.99 | 0.966-0.994 | 0.99 | 0.978-0.996 |
| **SAT Volume** | 0.99 | 0.973-0.990 | 0.99 | 0.981-0.999 |
| *Intraclass Correlation (ICC); Standardized Uptake Value (SUV); Subcutaneous Adipose Tissue (SAT) Visceral adipose tissue (VAT)* | | | | |

| **Table S2: Linear Regression: BMI (obesity) vs. Outcome Variables (Continuous)** | | |
| --- | --- | --- |
| **Outcome** | **B Estimate (SE); Continuous per 1 unit increase in BMI** | **p for linear trend** |
| VAT Inflammation (SUVmean) | -0.011 (0.010) | 0.30 |
| VAT Volume (cm3) | 147.6 (74.25) | 0.07 |
| SAT Inflammation (SUVmean) | -0.004 (0.004) | 0.42 |
| SAT Volume (cm3) | 316.3 (102.1) | **0.008** |
| *Body Mass Index (BMI), Standard Error (SE), Standardized Uptake Value (SUV), Subcutaneous Adipose Tissue (SAT), Visceral Adipose Tissue (VAT);* p-values in **bold** denote statistical significance (alpha <0.05) | | |

| **Table S3: Linear Regression - Change in Outcomes vs. CPAP adherence (mean hours/day)** | | |
| --- | --- | --- |
| **Outcomes** | **B Estimate (SE); Continuous per hour increase in CPAP adherence** | **p for linear trend** |
| Change in VAT Inflammation (SUVmean) | -0.013 (0.03), [CI -0.07, 0.05] | 0.68 |
| Change in VAT Volume (cm3) | -48.4 (18.7), [CI -88.5, -8.28] | **0.02** |
| *Confidence interval (CI), Continuous Positive Airway Pressure (CPAP), Standard Error (SE), Visceral Adipose Tissue (VAT);* p-values in **bold** denote statistical significance (alpha <0.05) | | |
